# Supplementary material for: Stem cell-based photodynamic therapy
Source: Royal Society of Chemistry journal article supplement (doi:10.1039/c2pp05417e), 2012-05-08
Supplement: c2pp05417e.pdf [file c2pp05417e.pdf]

## Stem Cell-Based Photodynamic Therapy

Tej B. Shrestha,\* Gwi M. Seo, Matthew T. Basel, Mausam Kalita, Hongwang Wang, David Villanueva, Marla Pyle, Sivasai Balivada, Raja Shekar Rachakatla, Heather Shinogle, Prem S. Thapa, David Moore, Deryl L. Troyer\* and Stefan H. Bossmann\*

### Supplementary Information

5-Aminolevulinic Acid:  $^1\text{H}$  NMR ( $\text{D}_2\text{O}$ ) 2.61 (t, 2H); 2.79 (t, 2H); 4.02 (s, 2H)

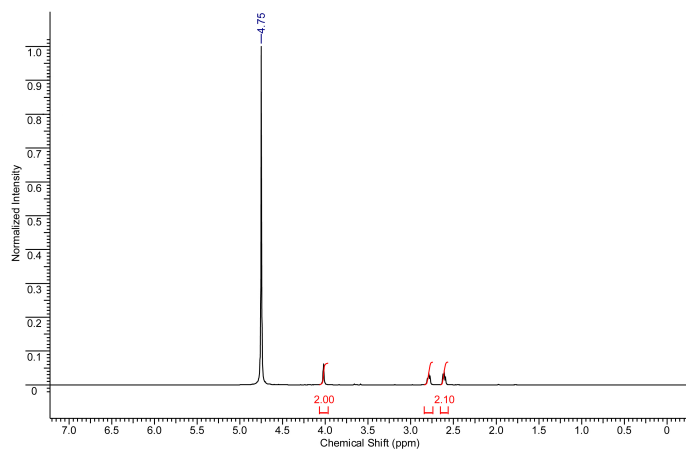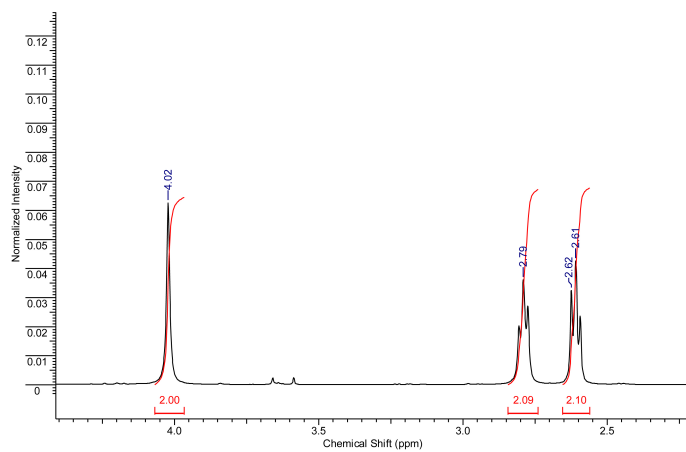

$^1\text{H}$  NMR ( $\text{D}_2\text{O}$ ) 2.61 (t, 2H); 2.79 (t, 2H); 4.02 (s, 2H)

Figure S1:  $^1\text{H}$ -NMR of 5-aminolevulinic acid, synthesized according to M. S. Kang, D. M. Kim, J. S. Kim and J. H. Jeong, *Arch Pharm Res*, 2005, **28**, 1111-3.

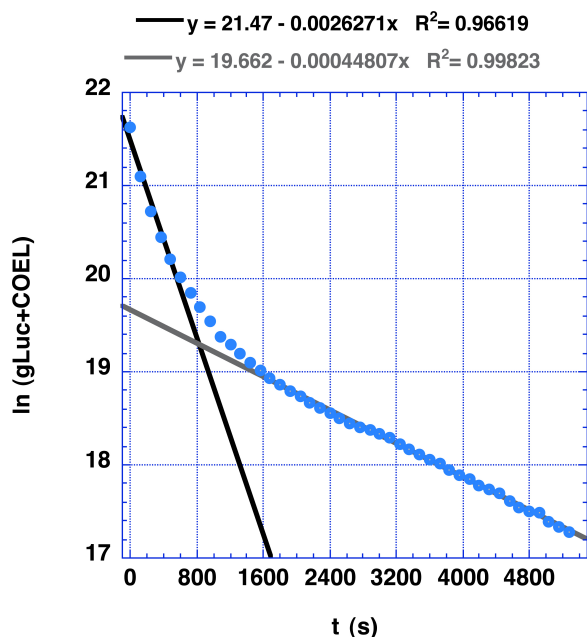

Figure S2: Kinetic Analysis of the time-profile of the bioluminescence occurring from gLuc: 100  $\mu$ L of supernatant from the medium, in which gLuc transfected neural stem cells (NSC) have been grown for 24h and 8  $\mu$ l of coelenterazine (1mg/mL).

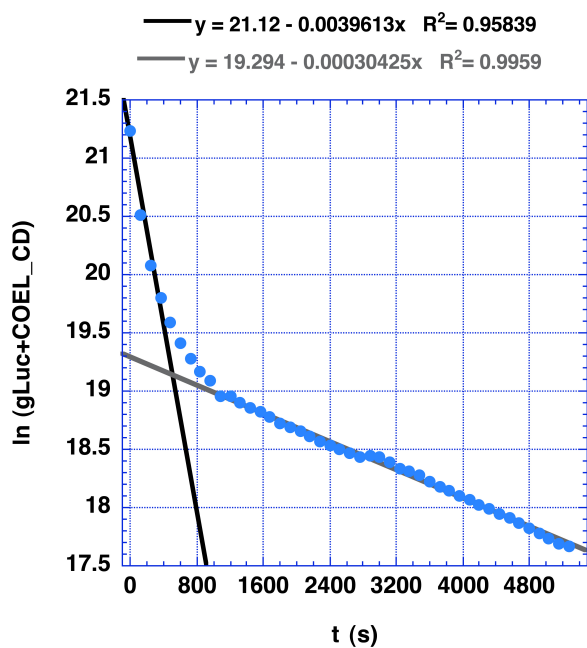

Figure S3: Kinetic Analysis of the time-profile of the bioluminescence occurring from gLuc: 100  $\mu$ L of supernatant from the medium, in which gLuc transfected neural stem cells (NSC) have been grown for 24h and 8  $\mu$ l of coelenterazine in  $\beta$ -cyclodextrin, ratio coelenterazine:cyclodextrin = 1:50 weight/weight).

It is noteworthy that coelenterazine and coelenterazine in  $\beta$ -cyclodextrin in water did not result in significant bioluminescence during the window of observation. The gLuc containing medium was not biofluorescent.

## Detailed Statistical Analysis

### *In Vivo* Experiment – 12 hours

ANOVA p value = 0.000925651

Multiple Comparisons Method: LSD

Multiple Comparisons Significance: 0.01

Multiple Comparisons:

|           | Treatment | Coel+gluc | Coel | Control |
|-----------|-----------|-----------|------|---------|
| Coel+gluc | no        |           |      |         |
| Coel      | no        | no        |      |         |
| Control   | yes       | yes       | yes  |         |
| ALA       | yes       | yes       | yes  | no      |

Homogenous Subsets

|           | 1 | 2 |
|-----------|---|---|
| Treatment | x |   |
| Coel+gluc | x |   |
| Coel      | x |   |
| Control   |   | x |
| ALA       |   | x |

### *In Vivo* Experiment – 24 hours

ANOVA p value = 0.001059569

Multiple Comparisons Method: LSD

Multiple Comparisons Significance: 0.01

Multiple Comparisons:

|           | Treatment | Coel+gluc | Coel | Control |
|-----------|-----------|-----------|------|---------|
| Coel+gluc | no        |           |      |         |
| Coel      | no        | no        |      |         |
| Control   | yes       | no        | no   |         |
| ALA       | yes       | yes       | yes  | no      |

Homogenous Subsets

|           | 1 | 2 | 3 |
|-----------|---|---|---|
| Treatment | x |   |   |
| Coel+gluc | x | x |   |
| Coel      | x | x |   |
| Control   |   | x | x |
| ALA       |   |   | x |

### In Vivo Experiment – 36 hours

ANOVA p value = 5.61951E-07

Multiple Comparisons Method: LSD

Multiple Comparisons Significance: 0.01

Multiple Comparisons:

|           | Treatment | Coel+gluc | Coel | Control |
|-----------|-----------|-----------|------|---------|
| Coel+gluc | yes       |           |      |         |
| Coel      | yes       | no        |      |         |
| Control   | yes       | yes       | no   |         |
| ALA       | yes       | yes       | yes  | no      |

Homogenous Subsets

|           | 1 | 2 | 3 | 4 |
|-----------|---|---|---|---|
| Treatment | x |   |   |   |
| Coel+gluc |   | x |   |   |
| Coel      |   | x | x |   |
| Control   |   |   | x | x |
| ALA       |   |   |   | x |

Multiple Comparisons Method: LSD

Multiple Comparisons Significance: 0.0001

Multiple Comparisons:

|           | Treatment | Coel+gluc | Coel | Control |
|-----------|-----------|-----------|------|---------|
| Coel+gluc | yes       |           |      |         |
| Coel      | yes       | no        |      |         |
| Control   | yes       | no        | no   |         |
| ALA       | yes       | no        | no   | no      |

Homogenous Subsets

|           | 1 | 2 |
|-----------|---|---|
| Treatment | x |   |
| Coel+gluc |   | x |
| Coel      |   | x |
| Control   |   | x |
| ALA       |   | x |

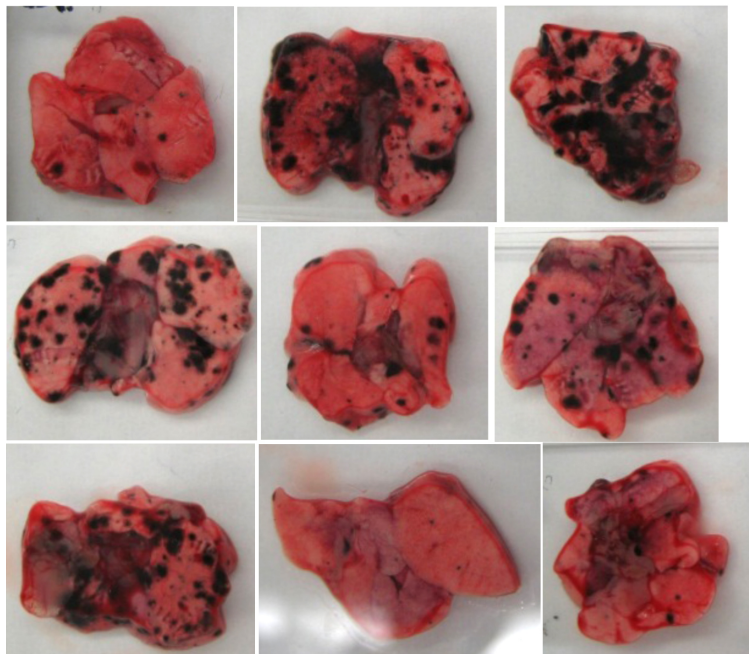

Figure S4: Lungs obtained from the treatment group (RUCMSC/gLuc + ALA + DFO + COEL)

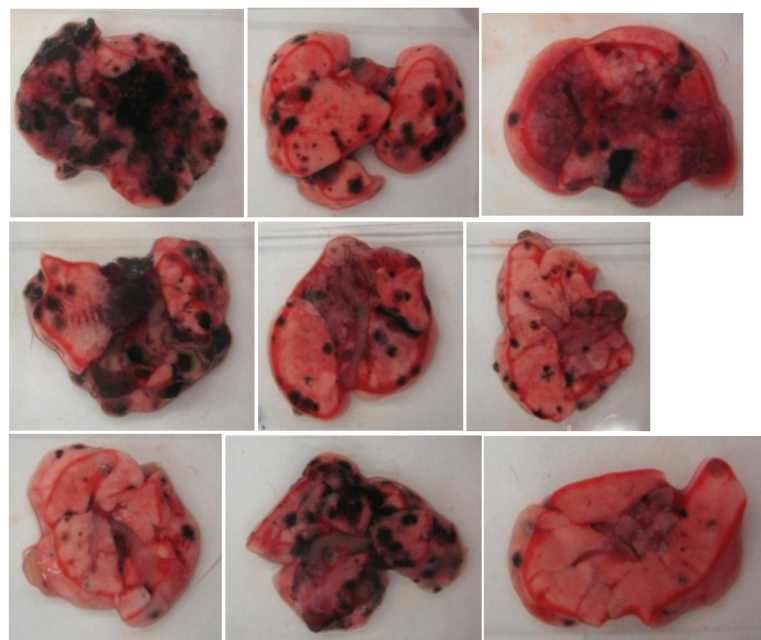

Figure S5: Lungs obtained from group 2 (RUCMSC/gLuc + ALA + DFO)

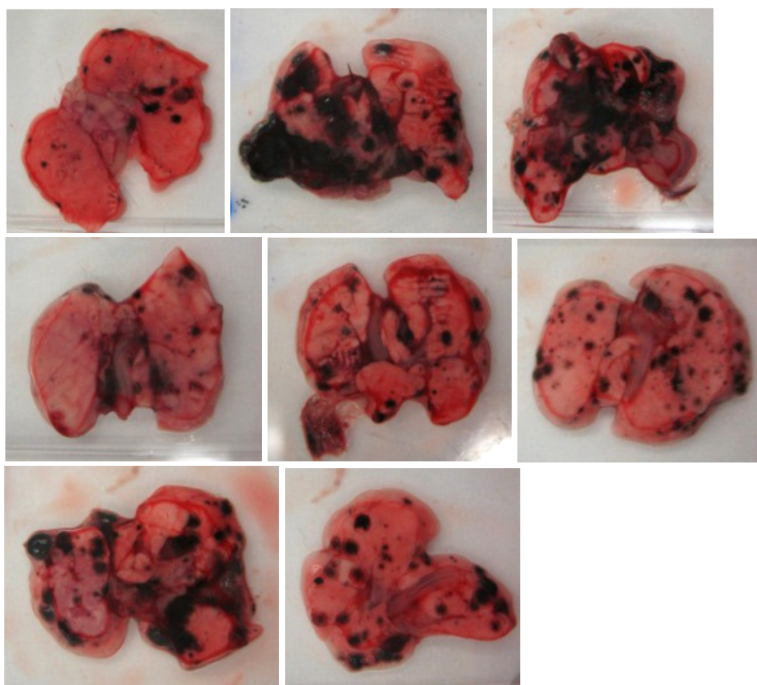

Figure S6: Lungs obtained from the control group (saline)
